# Supplementary material for: MicroRNA 130 family regulates the hypoxia response signal through the P-body protein DDX6
Source: PubMed Central journal article supplement — Nucleic Acids Res. 2011 Apr 12;39(14):6086–99. doi: 10.1093/nar/gkr194 (PMC3152344; doi:10.1093/nar/gkr194), 2011-04-12
Supplement: supp_gkr194_NAR_supplement_gkr194-27_04_11.pdf [file supp_gkr194_NAR_supplement_gkr194-27_04_11.pdf]

## **Supplementary Information**

### **MicroRNA 130 Family Regulates the Hypoxia Response Signal through the P-body Protein DDX6**

Ken Saito, Eisaku Kondo, Masayuki Matsushita

## FIGURE LEGENDS

**Supplementary Figure S1.** Predicted miRNAs in the HIF-1 $\alpha$  3'UTR. (A) 3'UTR seed matches to human HIF-1 $\alpha$  were identified using the partially overlapping predictions by miRBase (<http://microrna.sanger.ac.uk/targets/v2/>). Underlines show the miRNA target sites. The binding of miRNAs to the target sites (underlines) are shown. (B) miR-130a/b target sites in mouse and human HIF-1 $\alpha$  are shown. Bold type shows residues of the seed sequence.

**Supplementary Figure S2.** 3'UTR seed matches to human HIF-1 $\beta$  were identified using the partially overlapping predictions by TargetScan (<http://www.targetscan.org/>). Underlines show the miRNA target sites. The binding of miRNAs to target sites (underlines) are shown.

**Supplementary Figure S3.** Effects of miR-130a and 130b. (A) HEK 293 cells were transfected with 0.1 to 100 nM of pre-miR-130a and 130b for 48 h, and then cells were exposed to hypoxia for 8 h. Expression levels of HIF-1 $\beta$  were detected by western blots. Pre-miR negative control (Pre-miR N.C.) was 100 nM. Left lane (control) shows untransfected cells. HIF-1 $\beta$  expression levels were calculated by the relative expression of actin. The ratio to the control is shown. (B) HEK293 cells were transfected with pre-miRNAs and the mHIF-1 $\alpha$  3'UTR reporter gene. Renilla luciferase expression was standardized to firefly luciferase. Results are presented as mean  $\pm$  S.D. (n=3, control vs 130a: p=0.056, control vs 130b: p=0.028). (C) In the transient transfection of pre-miR-130a/130b, cells were exposed to hypoxia for 8 h and HIF-1 $\alpha$  mRNA levels were analyzed by qRT-PCR. The values were corrected by  $\beta$ -actin mRNA. Results are presented as means  $\pm$  S.D. (n=3).

**Supplementary Figure S4.** Knock-down of genes predicted to be miR-130 targets. (A) siRNAs for miR-130 target genes were transfected into HEK 293 cells. After 48 h, cells were exposed to hypoxia for 8 h. HIF-1 $\alpha$  expression was detected by western blotting. (B) Knock-down efficiency was examined by qRT-PCR. The ratio to the control siRNA is shown.

**Supplementary Figure S5.** DDX6 localization in HEK293 cells. (A) Cells were treated with normoxia and hypoxia for 48 h and were stained with anti-DDX6 and anti-DCP1A antibodies. The localization of endogenous proteins was examined by fluorescence

microscopy. Nuclei were stained with DAPI. Scale bar = 10  $\mu$ m. **(B)** HEK293 cells were exposed to normoxia and hypoxia for 8, 24, and 48 h. Endogenous DDX6 expression was detected by western blotting.

**Supplementary Figure S6.** Tissue distribution of pri-miR-130a. **(A)** *In situ* hybridization experiment on cryo-sections of E18.5 mouse embryos using antisense probes that recognize pri-miR-130a (left) or sense probes of pri-miR-130a (right). **(B)** Pri-miR-130a was expressed in the cortex (top panel, left), cerebellum (middle panel, left), and kidneys (bottom panel, left). Granule cells in the cortex and cerebellum are indicated by arrowheads. Renal tubes in kidneys are indicated by asterisks. Scale bar = 1 mm. Squares represent areas shown as higher magnifications. Scale bar = 100  $\mu$ m.

**Supplementary Figure S7.** Mature miR-130 levels in hypoxia. HeLa and NIH-3T3 cells were cultured under normoxia (N, solid bars) or hypoxia (H, open bars) for 72 h. Endogenous mature miR-130a and 130b levels were detected by qRT-PCR. RNA levels for miR-130a and 130b were normalized by 5S rRNA. The ratio to normoxia is the mean of three independent experiments  $\pm$  S.D. (P=0.1).

**Supplementary Figure S8.** Localization of DDX6 in neuronal cells. **(A)** After exposure to normoxia (left panel) and hypoxia (middle panel) for 48 h, cells were stained with DDX6 antibody or Dcp1a antibody as a P-bodies marker. The right panels (reoxygenation) show the localization of DDX6 and Dcp1a under normoxia for 12 h after hypoxia for 48 h. Nuclei were stained with DAPI. Scale bar = 10  $\mu$ m. **(B)** After exposure to normoxia (solid bar) and hypoxia (open bar) for 48 h, DDX6 mRNA levels in neuronal cells were measured by qRT-PCR. The values were corrected by  $\beta$ -actin mRNA. Results are presented as means  $\pm$  S.D. (n=3).

**Supplementary Figure S9.** Localization of DDX6 under oxidative stress and hypoxia. Neuronal cells were treated with or without 0.5 mM arsenite for 15 min as an oxidative stressor, and then cells were stained with DDX6 antibody and TIAR antibody as stress granule markers. Neuronal cells were also stained with DDX6 antibody and TIAR antibody under hypoxia and reoxygenation conditions. DDX6 foci and TIAR foci are indicated by arrowheads. Nuclei were stained with DAPI. Scale bar = 10  $\mu$ m.



actattgg

2581 ggtgaggata aggggtgggg gagaaaaaat cactgtttgt ttttaaaaag caaatctttc  
2641 tgtaaacaga ataaaagttc ctctcccttc ccttccctca cccctgacat gtaccccctt  
2701 tcccttctgg ctgttcccct gctctgttgc ctctctaagg taacatttat agaagaaatg  
2761 gaatgaatct ccaaggcttt taggactgtc tgaaaatttg aggctgggtg aagttaaaac  
2821 acctttcctt atgtctcctg acctgaaatt gtatagtgtt gatttgtgct gagatcaaga  
2881 ggcaggttag aagaacctga catccactgt ttgccttggga tagtatggct tgtttttgga  
2941 aagaaattct gaagagagtg gaggagagga gaaatgtcct catatttgag gaccatgaaa  
3001 cattgtaggt atatatgggg cttagcaag tttgagcata ggctcttttt gctgcctgtg  
3061 agcagtcctt ctggaaagaa acatgtgagt aagtgagaga gagtgtgtgt gtatgtgtgt  
3121 gtgtgtgtgt gtgcgcacac atgcttctgt atttcactct ttctccctat tagggagtta  
3181 tgcaaaaattt gtccccgatt ttacctttgt ctttctgtgt acttttcaaa gagtcctaag  
3241 gagttaaatc ttccaggtat tttccactta gtattgcagc caaagaatat ttaaataaac  
3301 gtctttgctg cgcttgcatc catgccagc caatatacaa ctgtaaagca aatatagaaa  
3361 gtcggctgtt gatacgattg tctgttatcg aacacattca gtgataaagc tgggttactg  
3421 ctgcttttgg tgctctcacc ttatctggaa gatctgcaaa cattaccta ataggctggc  
3481 aagataaaca ctttctggaa cccgagactt ggccataaag ataatgctgc atttttctgt  
3541 cagaatcaca tatgatgtgt gttctgtaga <sup>2</sup> ggttatttct gcatggaaac tcaacttctt  
3601 ggattagccg tcccagtgaa aatcctcatt gttggagtgt aaaccaaata cgaagccctc  
3661 ttgcaaagta gcctctttca tcccatactc aaaataccca gtttagcaag caactgagat  
3721 ttaagtctct ctggccctaa gaggtttttc ctctttgctc cctccaatct tgagattggg  
3781 ttttgcttta gagtgcaagt atcataattc cgtatgatag atggggcctg gacacccatc  
3841 tcaacagqgt cacttggtaa ttaacaatag ccatataaat gcgatacag gttactacce  
3901 tcacccttta ccttctcag <sup>4</sup> gtaacagtcg tagataccag cttttttttt ttttttttta  
3961 aattgqcttt ggccaqtagc taaagtgcaa gactgaatta atgagaagat atatt<sup>5</sup>aatg  
4021 tagtcataggg gactgagga gcaagggtgg ccttgaagag gccaaaggaa tgtccatttg  
4081 ctgagtttcc cttccttatg tctccagtct ggtgccaggt agtggagtaa aaaaggagac  
4141 agtttatttt tttattctat gtgcacactt acagtataca tatatattta taccacaatt  
4201 tacgaaacca aaaagttgag tttccaatgg aacccttgtt tttta<sup>6</sup>ataat cgacttttta  
4261 aatgtgatca ggactataat attgtacagt tattataggg cttttgggga aggggaggat  
4321 agcgagaaga tgctctgggg gttttgtttt tgcttttctc tcagggtttt atttttgact  
4381 gttttgtttt cttgttggcc atttctgtat tgctggcctc tgtgctaagc tttacaqtagg  
4441 caaaaataat gacatgtagc aaagat<sup>8</sup>ttt aaacaaaata ttttttctt ttgtaaaatt  
4501 tcttgtgttg tgtgatcttg <sup>8</sup> attg<sup>8</sup>cggtt tatcattcct ttccagttca taacaacag  
4561 gcaccacaaa ccagaggaat ctatagt<sup>8</sup>tta agctccagac atacaaacat aaggcacatt  
4621 gtgtctttaa tttcaggaat cagaaatcat aggttctga tcacattgca cgcctcccc  
4681 ctcaactgtc ctctgatcc tgacacattc tgagtaacat cagcaggaat gctctgacca  
4741 tgaggtgggg gttttggggg gggcggtg<sup>8</sup>cc tgggttcttg ggagagaggg gaagagtcgg  
4801 gacttga<sup>8</sup>aaa cacttagggc acatctggat gccttcccc agtatgtcct tttctggatt  
4861 aaaatgagtg aaatt<sup>8</sup>taac tgttcaaaaa aaaaaaaaaaaa aaa

| No. | Predicted miRNA     | No. | Predicted miRNA | No. | Predicted miRNA    |
|-----|---------------------|-----|-----------------|-----|--------------------|
| 1   | hsa-miR-29a/29c/29b | 4   | hsa-miR-135     | 7   | hsa-miR-129/129-5p |
| 2   | hsa-miR-103/107     | 5   | hsa-miR-193     | 8   | hsa-miR-221/222    |
| 3   | hsa-miR-10a/10b     | 6   | hsa-miR-23ab    |     |                    |

## Supplementary Figure S2

**A**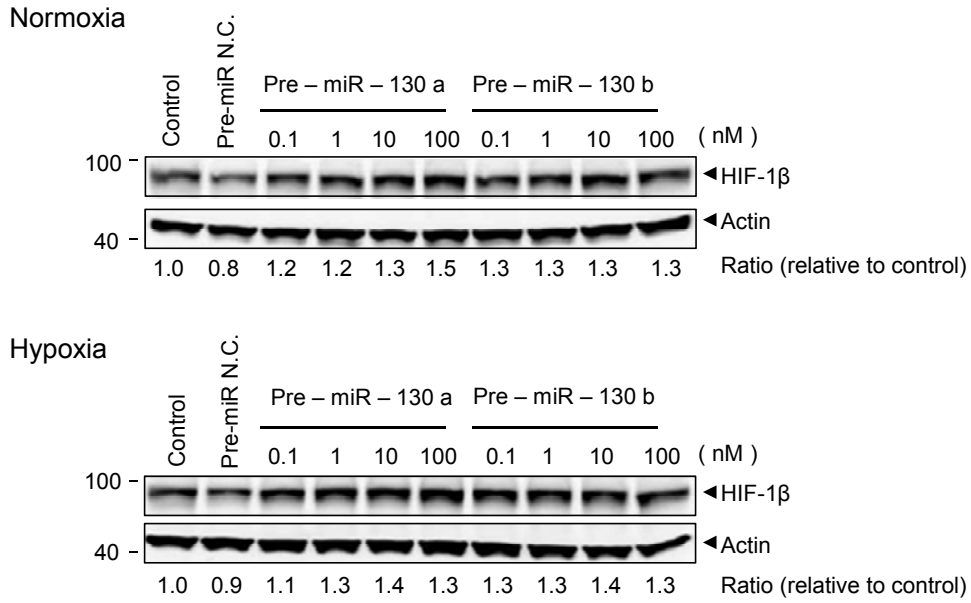**B**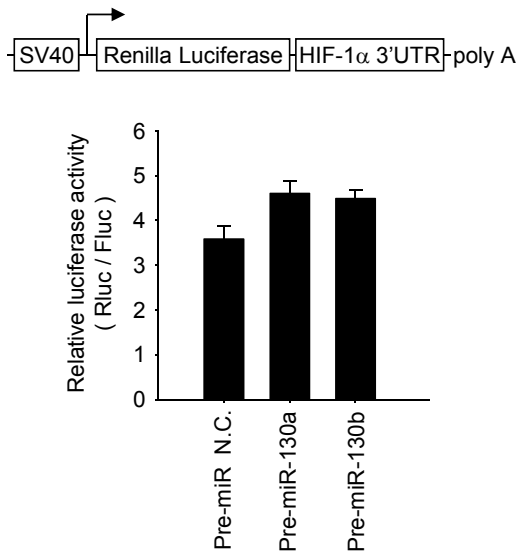**C**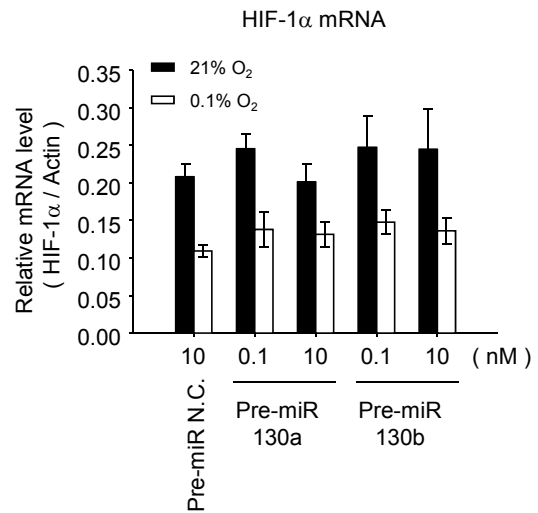

Supplementary Figure S3

**A**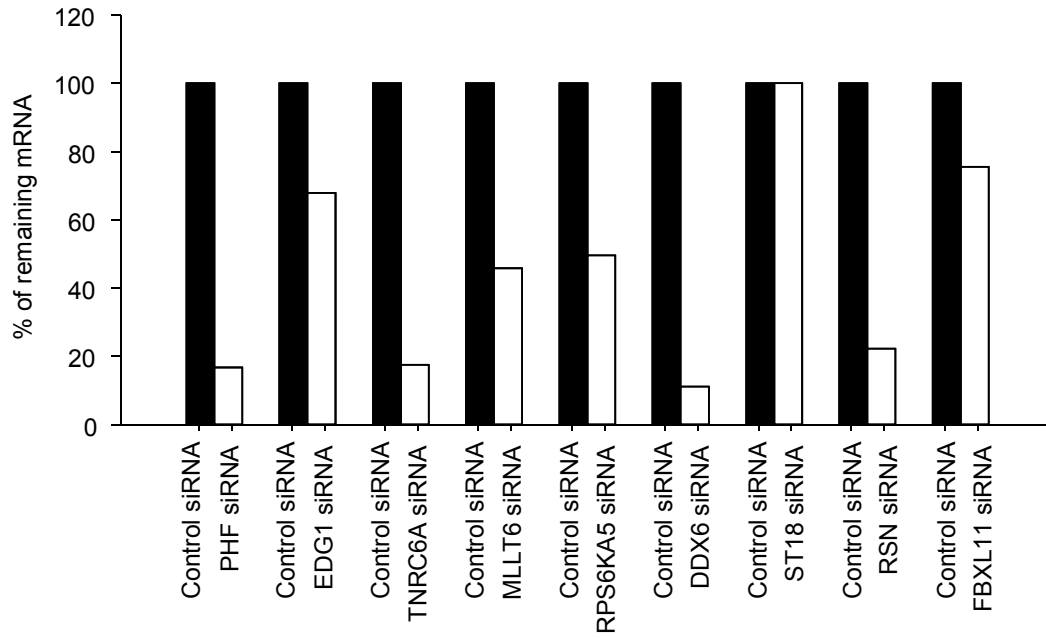**B**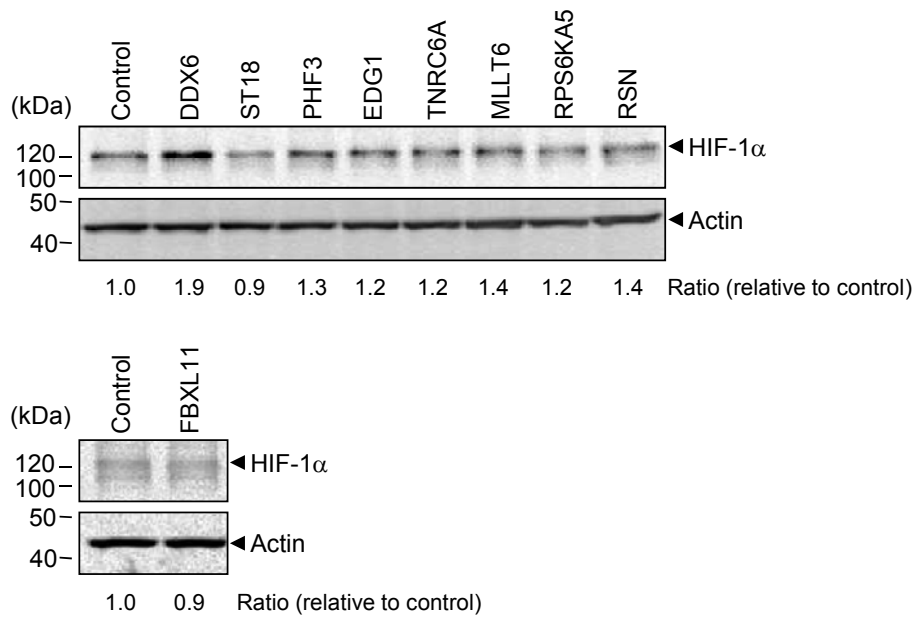

Supplementary Figure S4

**A**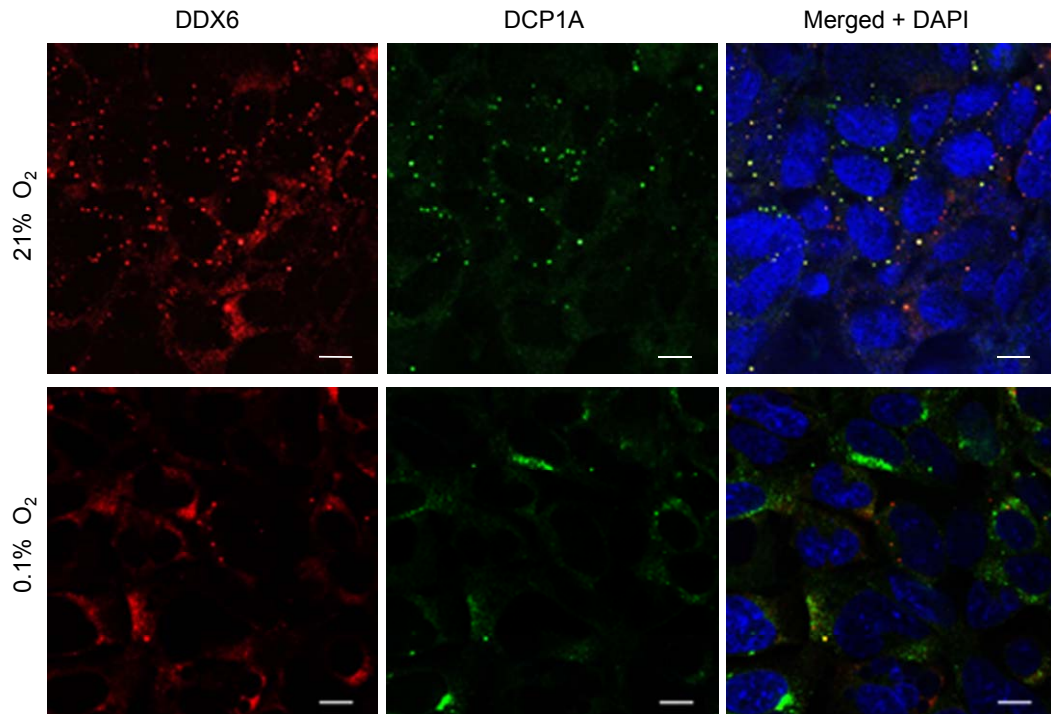**B**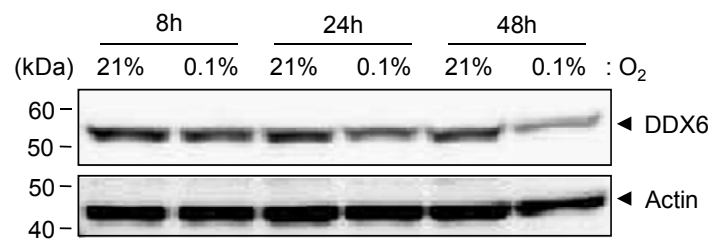

Supplementary Figure S5



**A**

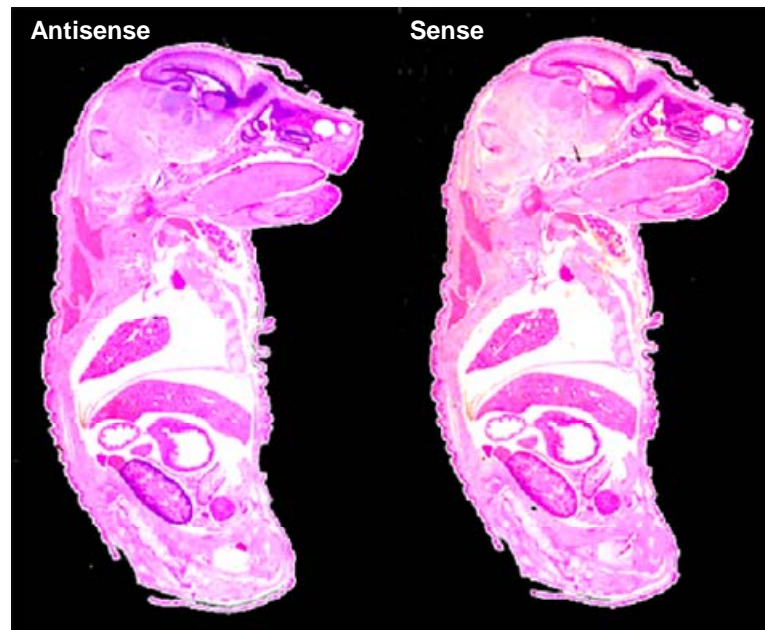

**B**

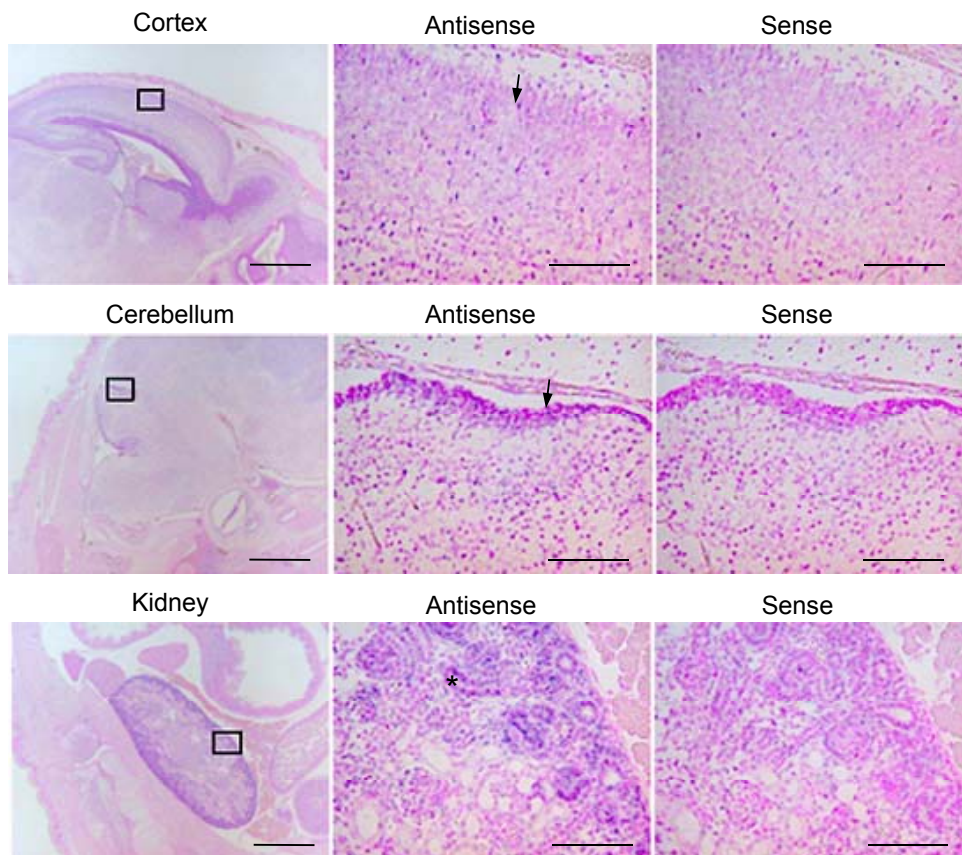

Supplementary Figure S6

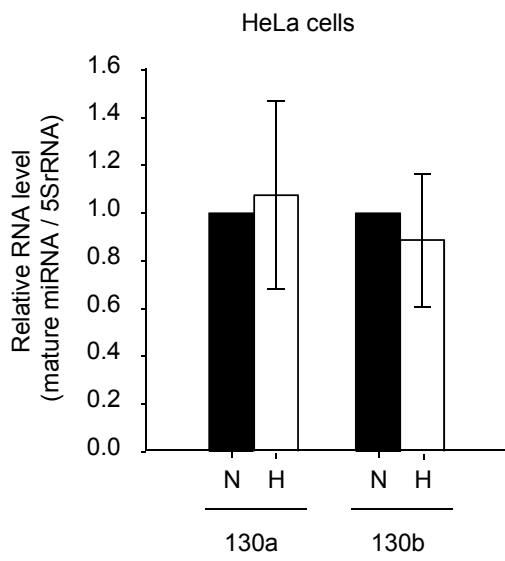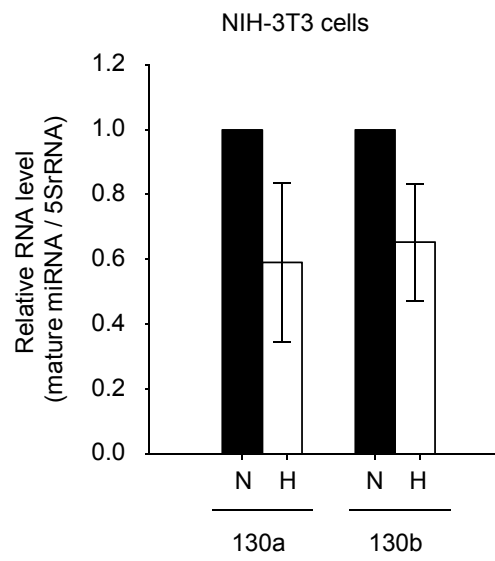

Supplementary Figure S7

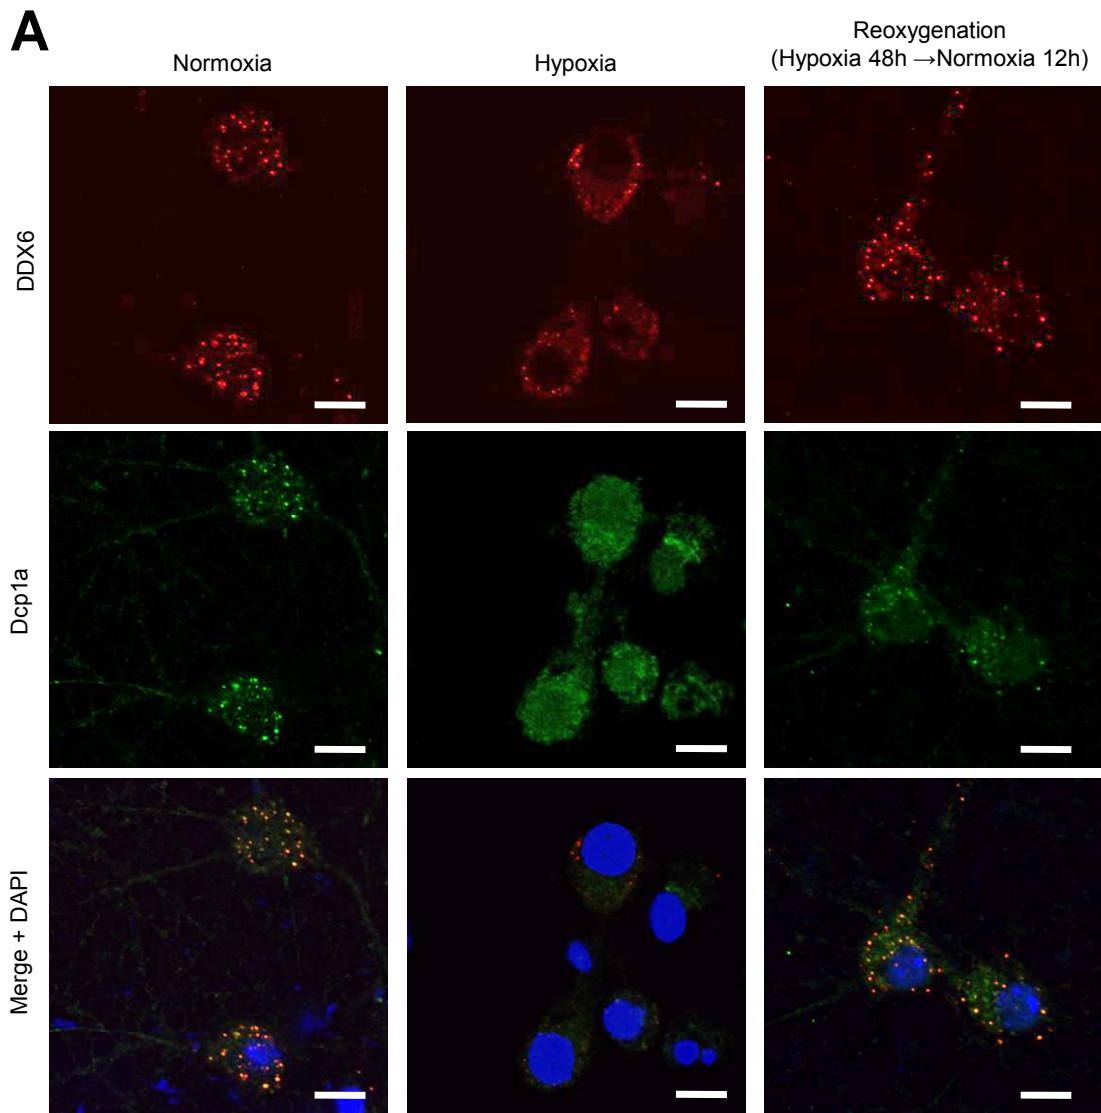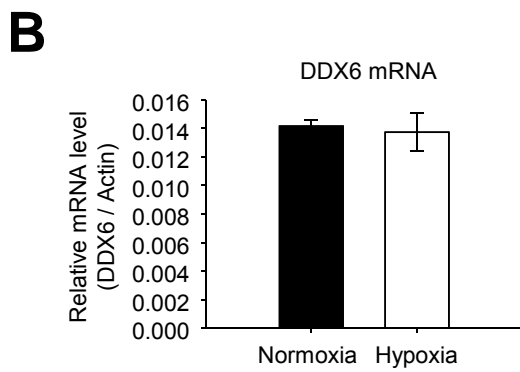

Supplementary Figure S8

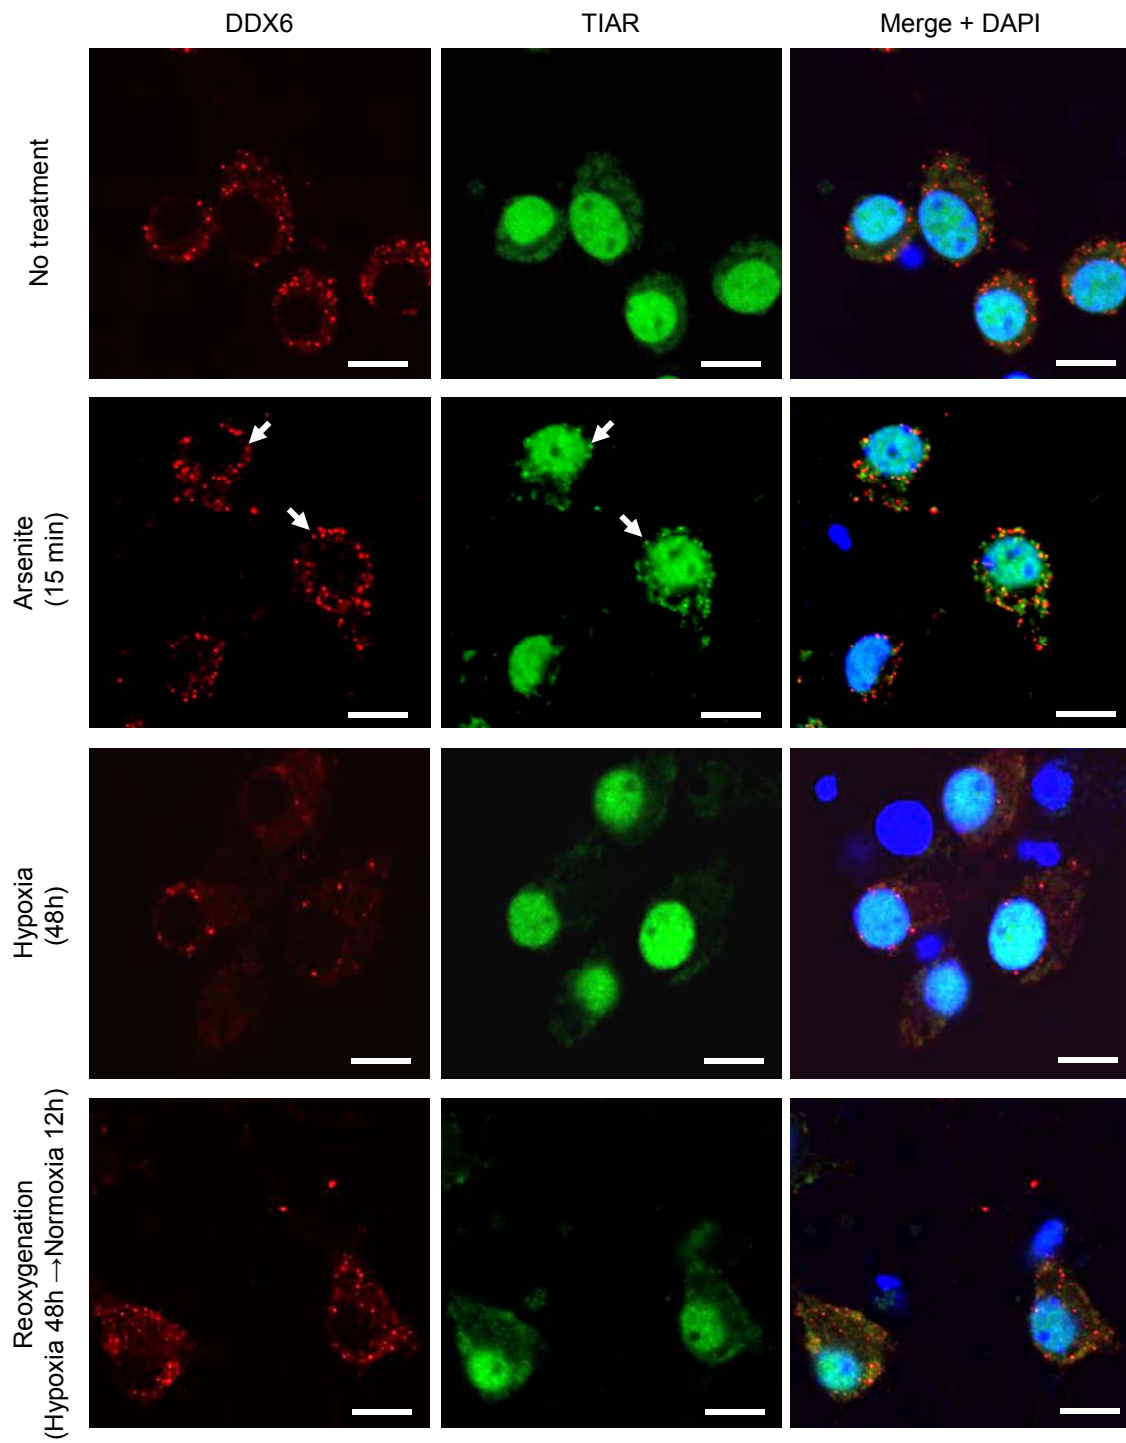

Supplementary Figure S9

**Supplementary Table S1. Prediction of miR-130a/b Target Genes in the Top 50**

| Database | Target Scan  | PICTAR           | miRANDA        |               | miRbase        |                |
|----------|--------------|------------------|----------------|---------------|----------------|----------------|
|          | miR-130/301  | miR-130/301      | miR-130a       | miR-130b      | miR-130a       | miR-130b       |
| 1        | MIER1        | RPS6KA5,variant1 | EPB41L5        | <u>DDX6</u>   | c18orf1        | RACGAP1        |
| 2        | SLAIN1       | MI-ER1           | <u>DDX6</u>    | <u>MLLT6</u>  | RACGAP1        | <u>PHF3</u>    |
| 3        | FLJ45187     | <u>FBXL11</u>    | <u>RPS6KA5</u> | ACVR1         | <u>PHF3</u>    | MET            |
| 4        | MYBL1        | FLJ45187         | <u>MLLT6</u>   | CDK11         | MET            | <u>TNRC6A</u>  |
| 5        | PAN3         | EIF2C4           | CDK11          | <u>MEOX2</u>  | <u>TNRC6A</u>  | Jade1          |
| 6        | <u>DDX6</u>  | FLJ30046         | TGFBR2         | <u>RSN</u>    | MARCH2         | MARCH2         |
| 7        | <u>CLIP1</u> | EIF2C1           | POU3F2         | SDC4          | <u>EDG1</u>    | <u>EDG1</u>    |
| 8        | ENPP5        | WDR47            | <u>MEOX2</u>   | EPS15         | LMTK2          | LMTK2          |
| 9        | TSC1         | ZNF238,variant 1 | ACVR1          | WNT1          | FAM43A         | FAM43A         |
| 10       | ESR1         | ZNF238,variant 2 | <u>FBXL11</u>  | LRIG1         | <u>MEOX2</u>   | <u>MEOX2</u>   |
| 11       | LDLR         | CDK11            | NRD1           | ABR           | <u>MLLT6</u>   | <u>MLLT6</u>   |
| 12       | GDA          | FLJ31818         | EIF2C1         | MTMR4         | COX7A2L        | MLLT10         |
| 13       | FLJ20366     | CFL2,variant 1   | DNCL12         | JARID2        | <u>ST18</u>    | COX7A2L        |
| 14       | RAB5A        | CFL2,variant 2   | EPS15          | JARID2        | FRZB           | <u>ST18</u>    |
| 15       | GJA1         | SYNJ1,variant 1  | ZFPM2          | TGFBR2        | PLAA           | PLAA           |
| 16       | TRIM2        | SFRS2IP          | COL19A1        | <u>ST18</u>   | HAT1           | NFIL3          |
| 17       | PIGA         | FBXO28           | C21orf107      | TSC1          | RTCD1          | HAT1           |
| 18       | EREG         | WDR20,variant 1  | HOXA5          | ACSL4         | SACM1L         | RTCD1          |
| 19       | MECP2        | DLL1             | TGOLN2         | <u>FBXL11</u> | RAB34          | SACM1L         |
| 20       | ADCY1        | ARL10C           | TXNIP          | POU3F         | CHST1          | RAB34          |
| 21       | FLJ31818     | DKFZp566C0424    | MLL            | C10orf6       | TMEM159        | CHST1          |
| 22       | GOLT1B       | ZFYVE9,variant 3 | CLN2           | NRP1          | CTSK           | TMEM159        |
| 23       | CDC2L6       | ZFYVE9,variant 1 | INHBB          | ELAVL2        | CEBPE          | CTSK           |
| 24       | ZNF217       | <u>MEOX2</u>     | ROBO1          | TRPS1         | ABHD3          | ABHD3          |
| 25       | ACSL4        | ZFPM2            | APG16L         | EIF2C1        | ATP6V1B2       | ARL6IP         |
| 26       | RNF38        | <u>ST18</u>      | <u>PHF3</u>    | ADCY1         | ARL6IP         | KCTD13         |
| 27       | PHF20        | HABP4            | C11orf15       | ZFPM2         | KCTD13         | NEUROG1        |
| 28       | CHST1        | C9orf54          | LRP8           | MLL           | UBE2D1         | UBE2D1         |
| 29       | ACVR1        | USP6             | <u>TNRC6</u>   | RAB14         | INOC1          | INOC1          |
| 30       | RAP2C        | USP32            | COX7A2L        | SIAT8C        | <u>RPS6KA5</u> | <u>RPS6KA5</u> |
| 31       | FBXO28       | LOC220594        | CD69           | RBBP8         | XAB1           | RXFP2          |
| 32       | WDR20        | PLCB1,variant 1  | <u>EDG1</u>    | ARHGAP21      | NUP107         | NUP107         |
| 33       | <u>ST18</u>  | ROBO1,variant 2  | TARDBP         | CD69          | SNAPAP         | SNAPAP         |

**(Continue Supplementary Table S1)**

| Rank No | Database      | Target Scan            | PICTAR     | miRANDBA     |          | miRbase     |  |
|---------|---------------|------------------------|------------|--------------|----------|-------------|--|
|         | miR-130/301   | miR-130/301            | miR-130a   | miR-130b     | miR-130a | miR-130b    |  |
| 34      | TSHZ1         | ROBO1,variant 1        | NHLH2      | TOMM34       | NPFFR2   | NPFFR2      |  |
| 35      | WDR47         | SDFR1,variant $\beta$  | RNF38      | SATB2        | OSTF1    | OSTF1       |  |
| 36      | BRWD1         | SDFR1,variant $\alpha$ | C14orf31   | <u>TNRC6</u> | TEX261   | PSAP        |  |
| 37      | EIF2C4        | FLJ20366               | GRM6       | MYST2        | PSAP     | ST8SIA3     |  |
| 38      | CPEB1         | GMRP-1                 | C14orf31   | CFLAR        | ST8SIA3  | KIAA0196    |  |
| 39      | ZNF3          | PLCB1,variant2         | <u>RSN</u> | SNX27        | SESTD1   | SESTD1      |  |
| 40      | TBL1XR1       | MTF1                   | SATB2      | MTF1         | RALGPS2  | RALGPS2     |  |
| 41      | <u>FBXL11</u> | CGI-141                | ESR1       | HAS3         | RAB9B    | RAB9B       |  |
| 42      | ZFYVE9        | ACVR1                  | BAHD1      | ULK2         | GADD45B  | GADD45B     |  |
| 43      | DNAJC16       | FLJ11011,variant1      | PXK        | LMTK2        | OTUD4    | SUGT1       |  |
| 44      | ZNF238        | FLJ11011,variant2      | OR1K1      | NEUROG1      | SGCB     | LY6D        |  |
| 45      | TGFBR2        | SMAD5,variant 1        | QKI        | E2F7         | SUGT1    | TRPC4       |  |
| 46      | SH3D19        | SMAD5,variant 2        | RAB34      | PHF12        | LY6D     | FIP1L1      |  |
| 47      | DICER1        | SMAD                   | ACBD3      | C11orf8      | CYP2U1   | RWDD2       |  |
| 48      | FAM73A        | FLJ11011,variant3      | QKI        | RPA2         | TRPC4    | ACVR1       |  |
| 49      | AAK1          | SIRT7                  | PRKAA1     | CSK          | FIP1L1   | NP_612361.1 |  |
| 50      | ERBB2IP       | CDC14A,variant1        | PPM1F      | TGOLN2       | RWDD2    | GOLT1B      |  |

Target genes of miR-130a and 130b were identified by TargetScan Release 3.0 (<http://www.targetscan.org/>), PICTAR (<http://pictar.mdc-berlin.de/>), miRanda Release 2005 (<http://www.microrna.org/>) and miRbase (<http://microrna.sanger.ac.uk/>). Under lines were shown as the commonly observed genes and highly ranked genes in four databases.

**Supplementary Table S2. Target sequences of siRNAs**

| siRNA   | Sequence (5' to 3')   |
|---------|-----------------------|
| DDX6    | CCGAAATGGCTTATGCCGCAA |
| ST18    | AAGACAAATCTTTAACAATAA |
| PHF3    | ATGCATTATCTTCAACCTCAA |
| EDG1    | CTCGGTCTCTGACTACGTCAA |
| TNRC6A  | AAGAGCTTAACTCATCTTTAA |
| MLLT6   | CAGGCTGTCTCAACAGCCTTA |
| RPS6KA5 | AAGCCAGTCATTCGAGATGAA |
| RSN6    | AACGATGAATTACGTCTGAAA |
| FBXL11  | CCAAATAAGTTTCGCTATC   |

**Supplementary Table S3. Oligonucleotide sequence**

| <b>Cloning</b>       |           | <b>Primer sequence ( 5' to 3' )</b>                          |
|----------------------|-----------|--------------------------------------------------------------|
| DDX6/pcDNA3          | Forward   | AAGCTTCGCCACCATGAGCACGGCCAGAACAGAGAACCCTGTT                  |
| DDX6/pFLAG           | Forward   | CTCGAGCTATGAGCACGGCCAGAACAGAGAAC                             |
|                      | Reverse   | GGATCCTTAAGGTTTCTCATCTTCTACAGGCTC                            |
| DDX6 3'UTR           | Forward   | GTCGACCAAGCATGCTTTGACAAATTACAA                               |
|                      | Reverse   | GCGGCCGCGGCATTGCGTTCATCTCTTTACAGAAGAAC                       |
| HIF-1 $\alpha$ 3'UTR | Forward   | CTCGAGGCGTTTCCTAATCTCATTCT                                   |
|                      | Reverse   | GCGGCCGCTGATATAACAAAACAGTACAGTTAGTGTTA                       |
| HIF-1 $\alpha$ IRES  | Forward   | CTCGAGCGCGAGGACTGTCCTCGCCGC                                  |
|                      | Reverse   | TGGATCCCGGGCGAATCGGTGCCCGCGTTG                               |
| DDX6 3'UTRmutation   | Forward   | CTTGTCTGAACGGTGTGCTGACTGAACATTAGCTGAACGAACTGC                |
| DDX6 3'UTRmutation   | Forward   | TGTTCCACTTGTCTGAACGGTGTGCTGACTG                              |
| <b>qRT-PCR</b>       |           | <b>Primer sequence ( 5' to 3' )</b>                          |
| human Actin          | Forward   | CCTCATGAAGATCCTCACCGA                                        |
|                      | Reverse   | TTGCCAATGGTGTGATGACCTGG                                      |
| 5S rRNA              | Forward   | CATACCACCCTGAACGCGCCC                                        |
|                      | Reverse   | CCTACAGCACCCGGTATTCCC                                        |
| VEGF                 | Forward   | CCCTGATGAGATCGAGTACAT                                        |
|                      | Reverse   | CGGCTTGTCACATCTGCAAGT                                        |
| Pri miR-130a         | Forward   | TCACTATTAGGTACAGAGTAG                                        |
|                      | Reverse   | CCTCAAGCAGCATTACCATCA                                        |
| Pre miR-130a         | Forward   | GAGCTCTTTTACATTGTGCT                                         |
|                      | Reverse   | GATGCCCTTTTAAACATTGCAC                                       |
| Mature miR-130a      | Stem loop | GTCGTATCCAGTGCAGGGTCCGAGGTATTCGCACTGGATACGACATGCCCT          |
|                      | Forward   | GCCGCCAGTGCAATGTTAAA                                         |
|                      | Reverse   | GTGCAGGGTCCGAGGT                                             |
| Mature miR-130b      | Stem loop | GTCGTATCCAGTGCAGGGTCCGAGGTATTCGCACTGGATACGACATGCCCT<br>TTCAT |
|                      | Forward   | GCCGCCAGTGCAATGATGAA                                         |
|                      | Reverse   | GTGCAGGGTCCGAGGT                                             |
| lin-4                | Stem loop | GTCGTATCCAGTGCAGGGTCCGAGGTATTCGCACTGGATACGACTCACAC           |
|                      | Forward   | GCCCTCCCTGAGACCTCAA                                          |
|                      | Reverse   | GTGCAGGGTCCGAGGT                                             |



(Continue Supplementary Table S3)

|                           |         |                                     |
|---------------------------|---------|-------------------------------------|
| Synthetic lin-4           |         | UCCCUGAGACCUCAAGUGUGA               |
| <b>RT-PCR for mRNP</b>    |         | <b>Primer sequence ( 5' to 3' )</b> |
| human HIF-1 $\alpha$      | Forward | ATGAGCCAGAAGAAGACTTTT               |
|                           | Reverse | GTGGTTGAGAATTCTTGGTG                |
| human GAPDH               | Forward | AGCCACATCGCTCAGACAC                 |
|                           | Reverse | GCCCAATACGACCAAATCC                 |
| mouse HIF-1 $\alpha$ IRES | Forward | CTCGAGCGCGAGGACTGTCCTCGCCGC         |
|                           | Reverse | TGGATCCCGGGCGAATCGGTGCCCGCGTTG      |
| mouse HIF-1 $\alpha$ CDS  | Forward | ATGAGCCGGAAGAAGACTTTTG              |
|                           | Reverse | GTGGCTGGGAGTTCTTCGTA                |
| mouse Actin               | Forward | CCTCATGAAGATCCTGACCGA               |
|                           | Reverse | TTGCCAATAGTGATGACCTGG               |

**Supplementary Table S4. Northern and in situ probes**

| Probe                                                  | Sequence ( 5' to 3' )                                                                                                                                                                                                                                                                                                                                                                                                                                                                                                                                                        |
|--------------------------------------------------------|------------------------------------------------------------------------------------------------------------------------------------------------------------------------------------------------------------------------------------------------------------------------------------------------------------------------------------------------------------------------------------------------------------------------------------------------------------------------------------------------------------------------------------------------------------------------------|
| mature miR-130a<br>LNA                                 | ATgCCcTTTtAaCAtTGcACTg                                                                                                                                                                                                                                                                                                                                                                                                                                                                                                                                                       |
| mature miR-130a<br>2MM LNA                             | ATgCCaTTTtAaCAtTGtACTg                                                                                                                                                                                                                                                                                                                                                                                                                                                                                                                                                       |
| mature miR-130b<br>LNA                                 | ATGcCCtTTcAtCAtTGcACTg                                                                                                                                                                                                                                                                                                                                                                                                                                                                                                                                                       |
| Pri miR-130a sense                                     | CACCACCACAACACAACCAGTTATTTCTTTGAGAAGTGTCAAATGATGGGA<br>CTCCACAGGGCGGTCTCACTTGGCTCTGCACCACCACCCCTCAAGAAAAAG<br>GTGATCTTTGCTGGGAAGGAAATGAGGACGAGGGACGAGAGGAAGGCCGTG<br>ACGTGAGCTGAGTGTGGCCAGGGACTGGGAGAAAGGGTGAGGAGGCCGGC<br>CGGCATGCCTTTGCTGCTGGCCGGAGCTCTTTTCACATTGTGCTACTGTCTAA<br>CGTGTACCGAGCAGTGCAATGTTAAAAGGGCATCGGCCTTGTAGTACTACCCA<br>GTGCCGGCAGCCTCCTCAGCATCACTGCATTTTCTCCACCTGAGCACCAGTC<br>AGCTACTCTGCTGGCAATTTGGATATATGGAGCCCTCCCTTAGATGAGGAAGCTA<br>AGGCTGTAGAGCTCCTAAGTTAACTGCTCTATCCTGAGCCCAACAGGAAGGCAC<br>CCATTTTTGTAGACCTGTCCAGAGAGATTTGAACTGAGGGGGTGAATGGT |
| Pri-miR-130a<br>antisense                              | Complement sequence of Pri miR-130a sense                                                                                                                                                                                                                                                                                                                                                                                                                                                                                                                                    |
| DIG labeled<br>mouse HIF-1 $\alpha$<br>sense probe     | CCTCAAGAAACGACCACTGCTAAGGCATCAGCATAACAGTGGCACTCACAGTCGGA<br>CAGCCTCACCAGACAGAGCAGGAAAGAGAGTCATAGAACAGACAGACAAAGCTCA<br>TCCAAGGAGCCTTAACCTGTCTGCCACTTTGAATCAAAGAAATACTGTTCTGAG<br>GAAGAATTAAACCCAAAGACAATAGCTTCGCAGAATGCTCAGAGGAAGCGAAAAA<br>TGGAACATGATGGCTCCCTTTTTCAAGCAGCAGGAATTGGAACATTATTGCAGCA<br>ACCAGGTGACTGTGCACCTACTATGTCACCTTCTGGAAACGAGTGAAAGGATTC<br>ATATCTAGTGAACAGAATGGAACGGAGCAAAAGACTATTATTTTAATACCCTCCG<br>ATTTAGCATGCAGACTGCTGGGGCAGTCAATGGATGAGAGTGGATTACCACAGCT<br>GACCAGTTACGATTGTGAAGTTAATGCTCCCATACAAGGCAGCAG                                         |
| DIG labeled<br>mouse HIF-1 $\alpha$<br>antisense probe | Complement sequence of HIF-1 $\alpha$ sense                                                                                                                                                                                                                                                                                                                                                                                                                                                                                                                                  |

Locked nucleic acids (LNA) were indicated by lower case in mature miR-130a, miR-130a 2MM and 130b LNA sequence.
